# Supplementary material
Source: HighWire-hosted journal article supplement (https://gut.bmj.com/content/69/7/1283)
Supplement: inline-supplementary-material-2 [file inline-supplementary-material-2.xlsx]

## Sheet: Data quality of WES data
Patient	Sample Name	Raw reads	Raw bases	Clean reads	Clean bases	CleanRate	ErrorRate	Q20	Q30	GC content	Mapping reads	Mapping ratio	Base cover	Cover Ratio	Average Dep	Base_10X	Ratio_10X	Base_20X	Ratio_20X	Base_30X	Ratio_30X
FAP1	FAP1 Blood	86249962	12937494300	84420400	12653860357	97.8077	0.02;0.06	97.65;92.09	93.50;81.20	46.12;46.78	84697593	0.9985	60257468	99.67	65.288	59386526	98.5546	56890058	94.4116	56890058	94.4116
	FAP1 N	47646346	7146951900	46725010	7003551509	97.9935	0.03;0.06	96.43;91.07	90.17;80.03	47.36;47.94	47006032	0.9984	60176108	99.5354	33.3698	56893665	94.5453	45738739	76.0081	45738739	76.0081
	FAP1 A1 R1	72595796	10889369400	71197124	10670628937	97.9912	0.02;0.06	97.38;91.92	92.98;80.92	47.55;48.26	71602794	0.9984	60240049	99.6412	52.6718	59138710	98.1717	55441656	92.0345	55441656	92.0345
	FAP1 A1 R2	83960064	12594009600	82393092	12348634883	98.0517	0.03;0.06	96.25;90.74	89.76;79.45	48.14;48.78	83111838	0.9983	60178770	99.5398	29.7501	56379347	93.6864	42348504	70.3712	42348504	70.3712
	FAP1 A1 R3	75440486	11316072900	74190632	11118443498	98.2536	0.02;0.04	97.21;93.69	92.55;85.23	48.45;48.90	75380922	0.9986	60172760	99.5299	31.1149	56715215	94.254	43515524	72.3176	43515524	72.3176
	FAP1 A2 R1	64521936	9678290400	63318076	9490026948	98.0548	0.03;0.06	96.06;91.05	89.37;80.05	47.42;47.98	63823739	0.9982	60218229	99.6051	45.2463	58654599	97.4034	53129381	88.2281	53129381	88.2281
	FAP1 A2 R2	47945360	7191804000	47034112	7049872470	98.0265	0.03;0.06	95.94;91.20	88.77;80.22	46.25;46.71	47422525	0.9984	60174718	99.5331	35.2224	57136752	94.9514	47162189	78.3754	47162189	78.3754
	FAP1 A2 R3	96718934	14507840100	94902910	14223606709	98.0408	0.03;0.06	96.00;91.00	89.24;79.93	48.26;48.85	95522504	0.9984	60265166	99.6828	67.7838	59689312	99.0445	57891735	96.0617	57891735	96.0617
	FAP1 C R1	93822628	14073394200	92226162	13823394431	98.2236	0.02;0.06	97.27;91.71	92.57;80.54	47.23;47.96	92753718	0.9984	60251809	99.6607	68.6378	59547583	98.8312	57597661	95.5949	57597661	95.5949
	FAP1 C R2	81094998	12164249700	79476280	11911463203	97.9219	0.02;0.06	97.28;92.05	92.72;81.12	47.72;48.42	80011347	0.9985	60250822	99.659	58.4158	59359365	98.5204	56402417	93.6127	56402417	93.6127
	FAP1 C R3	79114776	11867216400	77574876	11627212516	97.9776	0.03;0.06	96.59;91.53	90.34;80.81	46.73;47.22	78073075	0.9987	60245526	99.6503	58.3627	59258116	98.361	56175738	93.2447	56175738	93.2447
	FAP1 C R4	135291672	20293750800	133052516	19941152683	98.2625	0.02;0.06	97.06;91.41	92.21;80.06	49.17;49.99	134023831	0.9977	60282199	99.7109	94.038	59970944	99.4837	59251257	98.2898	59251257	98.2898
FAP2	FAP2 Blood	112182850	16827427500	110303506	16529562450	98.2299	0.02;0.03	97.92;95.20	94.25;89.20	47.92;48.15	110495449	0.9989	60296646	99.7348	106.321	59993979	99.498	59410068	98.5296	59410068	98.5296
	FAP2 N	90651308	13597696200	89297232	13380241078	98.4008	0.02;0.03	97.89;95.59	94.46;90.05	47.32;47.39	89610437	0.999	59372630	98.2064	63.9641	56531776	95.2152	51531298	86.793	51531298	86.793
	FAP2 A1 R1	126062726	18909408900	123353364	18485766188	97.7596	0.02;0.04	97.52;93.97	92.99;85.90	47.69;47.93	123578423	0.9988	59589607	98.5653	107.61	57976026	97.2922	55783584	93.6129	55783584	93.6129
	FAP2 A2 R1	162198694	24329804100	158503614	23753738345	97.6323	0.02;0.04	97.36;94.12	92.59;86.13	48.37;48.62	158900948	0.9988	59706674	98.759	139.938	58367336	97.7568	56911844	95.3191	56911844	95.3191
	FAP2 A2 R2	160149334	24022400100	156499140	23453434971	97.6315	0.02;0.04	97.37;94.01	92.63;85.95	49.00;49.25	156946496	0.9987	59691683	98.7342	140.63	58368768	97.7838	56864604	95.2639	56864604	95.2639
	FAP2 C1 R1	89806920	13471038000	88346542	13238599480	98.2745	0.09;0.04	89.39;93.98	74.64;86.24	49.27;48.83	88460414	0.9976	59514105	98.4404	83.4239	57406317	96.4583	53994538	90.7256	53994538	90.7256
	FAP2 C1 R2	98889742	14833461300	97446536	14602749261	98.4447	0.02;0.03	97.81;95.06	94.21;89.04	46.90;46.95	97676518	0.9987	59340216	98.1528	61.6102	56285796	94.8527	50933500	85.833	50933500	85.833
	FAP2 C1 R3	83273240	12490986000	81861214	12267245766	98.2088	0.12;0.04	87.60;94.05	71.54;86.24	48.86;48.12	81992055	0.9976	59444439	98.3252	80.2573	57135281	96.1154	53430693	89.8834	53430693	89.8834
	FAP2 C2 R1	110204330	16530649500	108315456	16231291658	98.1891	0.09;0.04	89.72;94.04	74.96;86.35	47.91;47.56	108540448	0.9976	59594174	98.5729	99.4723	57785504	96.965	55341808	92.8645	55341808	92.8645
	FAP2 C2 R2	72853870	10928080500	71657018	10737427964	98.2554	0.21;0.03	82.20;95.16	62.27;88.44	49.34;48.11	71889553	0.9969	59392475	98.2393	71.8807	56512320	95.1506	51882982	87.3562	51882982	87.3562
	FAP2 C2 R3	145530036	21829505400	143407162	21487351796	98.4326	0.02;0.03	97.65;95.16	93.93;89.17	48.40;48.51	143673819	0.9989	59523235	98.4555	89.6529	57693798	96.9265	54715261	91.9225	54715261	91.9225
	FAP2 C2 R4	80702884	12105432600	79279812	11880938330	98.1455	0.02;0.03	97.97;95.55	94.32;89.54	49.42;49.61	79558055	0.999	59480059	98.3841	72.0813	56816210	95.5214	52163081	87.6984	52163081	87.6984
	FAP2 C3 R1	152616188	22892428200	150337056	22528603370	98.4107	0.02;0.03	97.68;95.38	93.98;89.58	48.21;48.30	150579356	0.9991	59527254	98.4622	95.3512	57777829	97.0611	55076367	92.5229	55076367	92.5229
	FAP2 C3 R2	72525590	10878838500	71386232	10697919972	98.337	0.10;0.03	89.21;94.54	74.41;87.42	50.59;50.04	71645227	0.9977	59327200	98.1313	67.9231	56267869	94.8433	50935960	85.856	50935960	85.856
	FAP2 C3 R3	70649632	10597444800	69520790	10418762244	98.3139	0.14;0.04	87.05;94.40	70.79;87.02	50.35;49.41	69843313	0.9975	59318685	98.1172	69.108	56386310	95.0566	51231473	86.3665	51231473	86.3665
	FAP2 C3 R5	83785658	12567848700	82545450	12369272373	98.42	0.25;0.03	81.33;95.76	61.24;89.77	50.59;49.10	82602664	0.997	59374013	98.2087	83.696	57187363	96.3172	53546252	90.1847	53546252	90.1847
FAP3	FAP3 Blood	81583002	12237450300	80172956	12014994568	98.1822	0.02;0.03	97.99;95.46	94.43;89.75	47.44;47.66	80319282	0.9989	60262377	99.6781	77.8289	59732050	99.12	58428395	96.9567	58428395	96.9567
	FAP3 N	82306026	12345903900	80965968	12132305999	98.2699	0.02;0.03	97.73;95.44	94.08;89.77	47.66;47.75	81276713	0.9988	59301422	98.0887	60.1327	56225229	94.8126	50587874	85.3063	50587874	85.3063
	FAP3 A1 R1	122207298	18331094700	120353374	18034786302	98.3836	0.02;0.03	97.82;95.85	94.32;90.50	47.58;47.67	120575686	0.9992	59484519	98.3915	87.3593	57528780	96.7122	54489462	91.6028	54489462	91.6028
	FAP3 A1 R2	66572058	9985808700	65329768	9789594344	98.0351	0.09;0.04	89.37;94.19	74.60;86.38	48.55;48.15	65493150	0.9979	59408592	98.2659	60.5292	56169292	94.5474	50662277	85.2777	50662277	85.2777
	FAP3 A2 R1	89580252	13437037800	87975390	13183371957	98.1122	0.13;0.04	87.24;93.77	71.07;85.44	48.61;47.84	88142472	0.9977	59516921	98.4451	83.8803	57276938	96.2364	53830384	90.4455	53830384	90.4455
	FAP3 A2 R2	88509688	13276453200	86883572	13018828248	98.0595	0.09;0.04	89.51;93.82	74.64;85.64	48.38;48.09	87567841	0.9976	59580201	98.5498	77.8806	57239853	96.0719	53565870	89.9055	53565870	89.9055
	FAP3 C R1	132920378	19938056700	130976218	19626062565	98.4352	0.02;0.03	97.83;95.71	94.31;90.24	47.79;47.88	131239481	0.9991	59514988	98.4419	95.7197	57786335	97.0954	55163343	92.6882	55163343	92.6882
	FAP3 C R2	92186282	13827942300	90531362	13565210027	98.1	0.21;0.04	82.46;94.94	62.91;87.74	48.42;47.29	90664400	0.9975	59557387	98.512	86.4335	57355826	96.3035	54241636	91.0746	54241636	91.0746
FAP4	FAP4 Blood	143450196	21517529400	139884018	20964085396	97.4279	0.02;0.04	97.60;95.47	93.38;88.98	48.16;48.25	140379918	0.9992	60268205	99.6878	48.1801	59541008	98.7934	56195292	93.242	56195292	93.242
	FAP4 N1	61903684	9285552600	60727334	9096277021	97.9616	0.02;0.06	97.48;92.45	93.40;83.29	45.51;45.77	61639719	0.9971	60161127	99.5107	21.4555	52599054	87.4303	28712802	47.7265	28712802	47.7265
	FAP4 N2	59302116	8895317400	57698158	8642613761	97.1591	0.02;0.06	97.82;92.45	94.24;84.07	42.24;42.71	58376698	0.9969	60144270	99.4828	20.4095	51501042	85.6292	27260297	45.3248	27260297	45.3248
	FAP4 A1	179330318	26899547700	175619206	26310322696	97.8095	0.02;0.05	97.77;92.12	93.94;83.33	46.80;47.16	176211816	0.9977	60285922	99.7171	102.456	60004008	99.5324	59459838	98.6297	59459838	98.6297
	FAP4 A2	145570186	21835527900	141743004	21232820920	97.2398	0.02;0.06	97.73;92.39	93.90;83.97	45.16;45.45	142424122	0.9977	60280009	99.7073	66.2315	59663091	98.9766	57975206	96.1765	57975206	96.1765
	FAP4 A3	135111914	20266787100	131308908	19668571803	97.0483	0.02;0.06	97.82;92.82	94.24;84.64	42.78;43.24	131832019	0.9975	60273854	99.6971	47.9671	59468231	98.6634	55708530	92.4257	55708530	92.4257
	FAP4 A4	56656282	8498442300	55384832	8298043875	97.6419	0.02;0.05	97.67;92.27	93.41;82.47	45.13;45.60	55577874	0.9983	60217371	99.6037	37.1939	58113475	96.5062	49787539	82.6797	49787539	82.6797
	FAP4 A5 R1	85682568	12852385200	83858632	12564284612	97.7584	0.02;0.05	97.83;92.14	93.72;82.12	43.98;44.42	84168934	0.9982	60250239	99.6581	59.1038	59352346	98.5097	56535162	93.8339	56535162	93.8339
	FAP4 A5 R2	147474944	22121241600	143233940	21452972610	96.9791	0.02;0.06	97.75;92.50	94.10;84.10	42.91;43.41	143816434	0.9972	60269319	99.6896	49.3814	59562251	98.8268	56278354	93.3781	56278354	93.3781
	FAP4 A6 R1	75330416	11299562400	72841846	10909273232	96.546	0.02;0.04	98.06;92.19	94.71;83.58	43.51;43.67	73670547	0.9967	60185076	99.5503	24.8095	55376957	92.0111	35632105	59.2042	35632105	59.2042
	FAP4 A6 R2	125514450	18827167500	122201174	18302009477	97.2106	0.02;0.06	97.72;91.94	94.02;83.08	43.60;44.30	123600451	0.9968	60268910	99.6889	47.3195	59459475	98.657	55588988	92.2349	55588988	92.2349
	FAP4 A6 R3	75275716	11291357400	73488328	11008371222	97.4938	0.02;0.06	97.80;91.43	94.12;82.25	42.30;42.84	74018730	0.9962	60220655	99.6091	32.6968	57402411	95.3201	46091654	76.5379	46091654	76.5379
	FAP4 A7 R1	191122744	28668411600	186817644	27984896929	97.6158	0.02;0.06	97.86;92.28	94.27;83.20	45.31;45.57	187484687	0.9973	60282417	99.7113	93.4026	59956799	99.4598	59283981	98.3437	59283981	98.3437
	FAP4 A7 R2	81652598	12247889700	79443136	11899481458	97.1554	0.02;0.06	97.82;91.87	94.23;82.98	42.92;43.60	79924428	0.9966	60214992	99.5998	31.1558	57228428	95.0402	44924627	74.607	44924627	74.607
	FAP4 A7 R3	61915394	9287309100	60589008	9077125655	97.7369	0.02;0.06	97.77;91.70	93.92;82.65	46.34;46.75	60855001	0.9972	60211839	99.5945	34.9108	57872082	96.1141	48122754	79.9224	48122754	79.9224
FAP5	FAP5 Blood	103140838	15471125700	100994974	15132441739	97.8109	0.02;0.07	97.86;91.58	94.29;82.08	43.91;44.13	101220498	0.9965	60374746	99.864	53.3397	59282645	98.1911	55911082	92.6067	55911082	92.6067
	FAP5 N1	92767626	13915143900	90751624	13595977192	97.7063	0.02;0.05	97.46;91.71	92.92;81.54	45.67;46.22	91216236	0.9978	60402554	99.91	59.5979	59710548	98.8543	57384371	95.0032	57384371	95.0032
	FAP5 N2	63607228	9541084200	62001520	9286700632	97.3338	0.02;0.06	97.82;92.17	94.22;83.12	42.83;43.29	62299399	0.9969	60303445	99.7461	20.4684	52085546	86.3724	27177211	45.0674	27177211	45.0674
	FAP5 A1	56874036	8531105400	55412564	8301433043	97.3078	0.02;0.06	97.83;91.79	94.21;82.96	41.21;41.62	56269724	0.9952	60251638	99.6604	21.0194	50715405	84.1727	28157518	46.7332	28157518	46.7332
	FAP5 A3	68030254	10204538100	66301408	9933216594	97.3412	0.02;0.06	97.80;92.13	94.04;83.54	44.34;44.65	66484570	0.997	60310961	99.7585	31.6481	56805458	94.1876	44326106	73.4959	44326106	73.4959
	FAP5 A4	49887986	7483197900	48923650	7330898421	97.9648	0.02;0.06	97.57;91.60	93.50;82.20	44.24;44.47	49878349	0.9963	60167424	99.5211	20.4782	50252846	83.5217	26760433	44.4766	26760433	44.4766
	FAP5 A5 R1	82226874	12334031100	80321946	12033502552	97.5634	0.02;0.06	97.72;91.56	93.75;82.50	44.04;44.35	80839522	0.9968	60354469	99.8305	42.4224	58614218	97.1166	52492451	86.9736	52492451	86.9736
	FAP5 A5 R2	86957268	13043590200	84968496	12728994255	97.5881	0.02;0.07	97.84;91.94	94.24;82.64	44.92;45.19	85433050	0.997	60359266	99.8384	41.9441	58749165	97.3325	52617927	87.1746	52617927	87.1746
	FAP5 A7 R2	104824804	15723720600	102710476	15387946502	97.8645	0.02;0.06	97.71;91.90	93.81;82.97	46.96;47.37	103236914	0.9973	60402680	99.9102	58.6983	59672112	98.7905	57257599	94.7931	57257599	94.7931
	FAP5 A7 R3	99385736	14907860400	96596750	14468254225	97.0512	0.02;0.06	97.75;92.19	94.08;83.11	42.70;43.14	98153677	0.9969	60360224	99.84	29.2871	57204441	94.7718	43039961	71.3052	43039961	71.3052
	FAP5 A8 R1	120296370	18044455500	117131186	17545638346	97.2356	0.02;0.06	97.80;92.27	94.18;83.65	43.28;43.93	117579406	0.997	60405616	99.9151	47.6249	59448467	98.4155	55173243	91.3379	55173243	91.3379
	FAP5 A8 R2	62700772	9405115800	60752032	9100245724	96.7585	0.02;0.04	98.15;92.13	94.94;83.53	43.08;43.25	61162554	0.9969	60249331	99.6566	21.04	52201527	86.6425	28180859	46.7737	28180859	46.7737
	FAP5 A8 R3	72299408	10844911200	70086520	10498464972	96.8054	0.02;0.04	98.27;92.10	95.18;83.43	42.73;42.92	70632104	0.997	60312632	99.7613	27.0511	56161875	93.1179	39900035	66.1554	39900035	66.1554
MAP1	MAP1 Blood	97432634	14614895100	95863154	14367338126	98.3061	0.02;0.03	98.03;95.09	94.40;89.02	46.99;47.13	96012452	0.9987	60273388	99.6964	94.4577	59866819	99.3255	59016298	97.9144	59016298	97.9144
	MAP1 N	92328570	13849285500	90830510	13610858176	98.2784	0.02;0.03	97.77;95.42	94.20;89.74	47.40;47.47	91002500	0.999	59312990	98.1078	66.5684	56655395	95.5194	51884309	87.4755	51884309	87.4755
	MAP1 A1	122246068	18336910200	120212684	18015308808	98.2462	0.02;0.03	98.01;95.48	94.27;89.28	47.41;47.56	120484896	0.9991	59622430	98.6196	109.027	58029500	97.3283	55937625	93.8198	55937625	93.8198
	MAP1 A2	102911330	15436699500	101386000	15192526956	98.4182	0.02;0.03	97.75;95.23	94.16;89.33	47.33;47.41	101585764	0.999	59351226	98.171	62.7013	56358858	94.9582	51122873	86.1362	51122873	86.1362
	MAP1 A3	84962502	12744375300	83496888	12512227239	98.1784	0.02;0.03	97.93;95.46	94.18;89.34	48.63;48.86	83648603	0.999	59502528	98.4213	74.462	57169362	96.0789	53220476	89.4424	53220476	89.4424
	MAP1 A4	122582586	18387387900	120777670	18098897637	98.431	0.02;0.03	97.98;95.63	94.61;90.09	46.72;46.77	121037341	0.9991	59448180	98.3314	88.496	57512714	96.7443	54508151	91.6902	54508151	91.6902
	MAP1 A5	126087548	18913132200	124116062	18599664229	98.3426	0.10;0.03	89.16;94.55	74.13;87.44	49.71;49.21	124229548	0.9977	59512521	98.4378	116.402	58060208	97.5597	56079399	94.2313	56079399	94.2313
	MAP1 C1	100878536	15131780400	99202272	14866965416	98.2499	0.02;0.03	97.81;95.42	94.21;89.72	46.92;46.97	99364961	0.999	59340423	98.1532	74.0313	56945090	95.9634	52911551	89.1661	52911551	89.1661
	MAP1 C2	91298630	13694794500	89839940	13462501744	98.3038	0.02;0.03	97.72;95.42	94.08;89.72	47.48;47.58	90006853	0.999	59336597	98.1468	66.1176	56577281	95.3497	51667410	87.0751	51667410	87.0751

## Sheet: Germline mutation summary
Germline mutation summary
Patient	Gene	Type	Start	Ref	Alt	Function	Effect	SampleName	Information
									Genotype	Ref depth	Alt depth	Allele fraction	APC Genotype (from Sequenza)	Sanger Validation
FAP1	APC	Germline	112175211	TAAAAG	T	frameshift_variant	p.Glu1309fs	FAP1 Blood	0/1	32	26	0.448276	/	√
								FAP1 N	0/1	10	13	0.565217	/	√
								FAP1 A1 R1	0/1	7	31	0.815789	LOH	√
								FAP1 A1 R2	0/1	3	18	0.857143	LOH	√
								FAP1 A1 R3	1/1	0	20	1	LOH	√
								FAP1 A2 R1	1/1	0	30	1	LOH	√
								FAP1 A2 R2	1/1	0	20	1	LOH	√
								FAP1 A2 R3	1/1	0	41	1	LOH	√
								FAP1 C R1	0/1	17	42	0.711864	LOH	√
								FAP1 C R2	0/1	6	41	0.87234	LOH	√
								FAP1 C R3	0/1	10	36	0.782609	LOH	√
								FAP1 C R4	0/1	25	44	0.637681	LOH	√
FAP2	APC	Germline	112175475	G	GT	frameshift_variant&stop_gained	p.Glu1397fs	FAP2 Blood	0/1	41	38	0.481013	/	√
								FAP2 N	0/1	30	28	0.482759	/	√
								FAP2 A1 R1	0/1	35	43	0.551282	Het	√
								FAP2 A2 R1	0/1	48	69	0.589744	Het	√
								FAP2 A2 R2	0/1	57	35	0.380435	Het	√
								FAP2 C1 R1	0/1	27	33	0.55	Het	√
								FAP2 C1 R2	0/1	33	21	0.388889	Het	√
								FAP2 C1 R3	0/1	28	32	0.533333	Het	√
								FAP2 C2 R1	0/1	38	37	0.493333	Het	√
								FAP2 C2 R2	0/1	23	20	0.465116	Het	√
								FAP2 C2 R3	0/1	51	25	0.328947	Het	√
								FAP2 C2 R4	0/1	26	25	0.490196	Het	√
								FAP2 C3 R1	0/1	43	32	0.426667	Het	√
								FAP2 C3 R2	0/1	28	27	0.490909	Het	√
								FAP2 C3 R3	0/1	21	15	0.416667	Het	√
								FAP2 C3 R5	0/1	46	32	0.410256	Het	√
								FAP2 LyM1 R1	0/1	32	28	0.466667	Het	√
								FAP2 LyM1 R2	0/1	45	35	0.4375	Het	√
								FAP2 LyM2 R1	0/1	53	44	0.453608	Het	√
								FAP2 LyM2 R2	0/1	40	36	0.473684	Het	√
FAP3	APC	Germline	112173388	G	A	Stop_gained	p.Trp699*	FAP3 Blood	0/1	38	55	0.591398	/	√
								FAP3 N	0/1	59	55	0.482456	/	√
								FAP3 A1 R1	0/1	82	71	0.464052	Het	√
								FAP3 A1 R2	0/1	48	47	0.494737	Het	√
								FAP3 A2 R1	0/1	67	68	0.503704	Het	√
								FAP3 A2 R2	0/1	59	67	0.531746	Het	√
								FAP3 C R1	0/1	79	59	0.427536	Het	√
								FAP3 C R2	0/1	75	64	0.460432	Het	√
FAP4	APC	Germline	112137081	G	C	splice_donor_variant&intron_variant	c.834+1G>C	FAP4 Blood	0/1	17	14	0.451613	/	√
								FAP4 N1	0/1	7	9	0.5625	/	√
								FAP4 N2	0/1	2	7	0.777778	/	√
								FAP4 A1	0/1	13	35	0.729167	Het	√
								FAP4 A2	0/1	35	19	0.351852	Het	√
								FAP4 A3	0/1	14	8	0.363636	Het	√
								FAP4 A4	0/1	13	8	0.380952	Het	√
								FAP4 A5 R1	0/1	25	18	0.418605	Het	√
								FAP4 A5 R2	0/1	18	15	0.454545	Het	√
								FAP4 A7 R1	0/1	5	4	0.444444	Het	√
								FAP4 A7 R2	0/1	14	14	0.5	Het	√
								FAP4 A7 R3	0/1	8	12	0.6	Het	√
								FAP4 A8 R1	0/1	8	49	0.859649	LOH	√
								FAP4 A8 R2	0/1	7	33	0.825	LOH	√
								FAP4 A8 R3	0/1	3	28	0.903226	LOH	√
FAP5	APC	Post-zygotic	112175419	TG	T	frameshift_variant	p.Val1377fs	FAP5 A3	0/1	8	15	0.652174	LOH	√
								FAP5 A4	0/1	5	7	0.583333	LOH	√
								FAP5 A5 R1	0/1	4	32	0.888889	LOH	√
								FAP5 A5 R2	0/1	10	35	0.777778	LOH	√
								FAP5 A7 R2	0/1	10	31	0.756098	LOH	√
								FAP5 A7 R3	0/1	3	17	0.85	LOH	√
								FAP5 A8 R1	0/1	10	31	0.756098	LOH	√
								FAP5 A8 R2	0/1	5	16	0.761905	LOH	√
								FAP5 A8 R3	0/1	7	16	0.695652	LOH	√
			112175417	TA	T	frameshift_variant	p.Tyr1376fs	FAP5 A3	0/1	8	15	0.652174	LOH	√
								FAP5 A4	0/1	5	7	0.583333	LOH	√
								FAP5 A5 R1	0/1	4	32	0.888889	LOH	√
								FAP5 A5 R2	0/1	10	35	0.777778	LOH	√
								FAP5 A7 R2	0/1	10	31	0.756098	LOH	√
								FAP5 A7 R3	0/1	3	17	0.85	LOH	√
								FAP5 A8 R1	0/1	10	31	0.756098	LOH	√
								FAP5 A8 R2	0/1	5	16	0.761905	LOH	√
								FAP5 A8 R3	0/1	7	16	0.695652	LOH	√
			112175411	GAAC	G	disruptive_inframe_deletion	p.Glu1374_His1375delinsAsp	FAP5 A3	0/1	8	15	0.652174	LOH	√
								FAP5 A4	0/1	5	7	0.583333	LOH	√
								FAP5 A5 R1	0/1	4	32	0.888889	LOH	√
								FAP5 A5 R2	0/1	10	35	0.777778	LOH	√
								FAP5 A7 R2	0/1	10	30	0.75	LOH	√
								FAP5 A7 R3	0/1	3	18	0.857143	LOH	√
								FAP5 A8 R1	0/1	10	30	0.75	LOH	√
								FAP5 A8 R2	0/1	5	16	0.761905	LOH	√
								FAP5 A8 R3	0/1	7	16	0.695652	LOH	√
MAP1	MUTYH	Germline	45800165	G	A	stop_gained	p.Arg19*	MAP1 Blood	0/1	26	27	0.509434	/	√
								MAP1 N	0/1	23	24	0.510638	/	√
								MAP1 A1	0/1	36	36	0.5	/	√
								MAP1 A2	0/1	27	38	0.584615	/	√
								MAP1 A3	0/1	28	32	0.533333	/	√
								MAP1 A4	0/1	30	37	0.552239	/	√
								MAP1 A5	0/1	31	39	0.557143	/	√
								MAP1 C1	0/1	31	23	0.425926	/	√
								MAP1 C2	0/1	21	10	0.322581	/	√
		Germline	45797972	G	A	stop_gained	p.Gln267*	MAP1 Blood	0/1	40	48	0.545455	/	√
								MAP1 N	0/1	46	61	0.570093	/	√
								MAP1 A1	0/1	98	117	0.544186	/	√
								MAP1 A2	0/1	54	42	0.4375	/	√
								MAP1 A3	0/1	73	61	0.455224	/	√
								MAP1 A4	0/1	59	62	0.512397	/	√
								MAP1 A5	0/1	115	119	0.508547	/	√
								MAP1 C1	0/1	54	70	0.564516	/	√
								MAP1 C2	0/1	27	60	0.689655	/	√

## Sheet: APC somatic mutation profile
APC Somatic mutation
								FAP1 (genotype: Ref, Alt: Allele fracion )											FAP2 (genotype: Ref, Alt: Allele fracion )															FAP3 (genotype: Ref, Alt: Allele fracion )							FAP4 (genotype: Ref, Alt: Allele fracion )
Chr	Start	Ref	Alt	Gene Symbol	Function	Region	Effect	FAP1 N	FAP1 A1 R1	FAP1 A1 R2	FAP1 A1 R3	FAP1 A2 R1	FAP1 A2 R2	FAP1 A2 R3	FAP1 C R1	FAP1 C R2	FAP1 C R3	FAP1 C R4	FAP2 N	FAP2 A1 R1	FAP2 A2 R1	FAP2 A2 R2	FAP2 C1 R1	FAP2 C1 R2	FAP2 C1 R3	FAP2 C2 R1	FAP2 C2 R2	FAP2 C2 R3	FAP2 C2 R4	FAP2 C3 R1	FAP2 C3 R2	FAP2 C3 R3	FAP2 C3 R5	FAP3 N	FAP3 A1 R1	FAP3 A1 R2	FAP3 A2 R1	FAP3 A2 R2	FAP3 C R1	FAP3 C R2	FAP4 N1	FAP4 N2	FAP4 A1	FAP4 A2	FAP4 A3	FAP4 A4	FAP4 A5 R1	FAP4 A5 R2	FAP4 A6 R1
chr5	112175642	GAAGTACCT	G	APC	frameshift_variant	Coding	p.Val1452fs	NA	NA	NA	NA	NA	NA	NA	NA	NA	NA	NA	NA	NA	NA	NA	NA	NA	NA	NA	NA	NA	NA	NA	NA	NA	NA	NA	NA	NA	0/1:41,36:0.444	NA	NA	NA	NA	NA	NA	NA	NA	NA	NA	NA	NA
chr5	112175639	C	T	APC	stop_gained	Coding	p.Arg1450*	NA	NA	NA	NA	NA	NA	NA	NA	NA	NA	NA	NA	NA	NA	NA	NA	NA	NA	NA	NA	NA	NA	NA	NA	NA	NA	NA	NA	NA	NA	0/1:46,35:0.394	0/1:117,8:0.065	NA	NA	NA	NA	NA	NA	NA	NA	NA	NA
chr5	112175610	CA	C	APC	frameshift_variant	Coding	p.Pro1440fs	NA	NA	NA	NA	NA	NA	NA	NA	NA	NA	NA	NA	NA	NA	NA	NA	NA	NA	NA	NA	NA	NA	NA	NA	NA	NA	NA	NA	0/1:49,22:0.318	NA	NA	NA	NA	NA	NA	NA	NA	NA	NA	NA	NA	NA
chr5	112175951	G	GA	APC	frameshift_variant	Coding	p.Thr1556fs	NA	NA	NA	NA	NA	NA	NA	NA	NA	NA	NA	NA	NA	NA	NA	NA	NA	NA	NA	NA	NA	NA	NA	NA	NA	NA	NA	0/1:120,52:0.299	NA	NA	NA	NA	NA	NA	NA	NA	NA	NA	NA	NA	NA	NA
chr5	112175198	C	CAGAAATAATAGCAGAAATAA	APC	frameshift_variant&stop_gained	Coding	p.Ile1304fs	NA	NA	NA	NA	NA	NA	NA	NA	NA	NA	NA	NA	NA	NA	NA	NA	NA	NA	NA	NA	NA	NA	NA	NA	NA	NA	NA	NA	NA	NA	NA	0/1:134,3:0.025	NA	NA	NA	NA	NA	NA	NA	NA	NA	NA
chr5	112175480	G	T	APC	stop_gained	Coding	p.Glu1397*	NA	NA	NA	NA	NA	NA	NA	NA	NA	NA	NA	NA	NA	NA	NA	NA	NA	NA	NA	NA	NA	NA	NA	NA	NA	NA	NA	NA	NA	NA	NA	NA	0/1:55,12:0.182	NA	NA	NA	NA	NA	NA	NA	NA	NA
chr5	112174742	G	T	APC	stop_gained	Coding	p.Glu1151*	NA	NA	NA	NA	NA	NA	NA	NA	NA	NA	NA	NA	NA	NA	NA	NA	NA	NA	NA	NA	NA	NA	NA	NA	NA	NA	NA	NA	NA	NA	NA	NA	NA	NA	NA	NA	NA	NA	NA	NA	NA	NA
chr5	112175969	G	T	APC	stop_gained	Coding	p.Glu1560*	NA	NA	NA	NA	NA	NA	NA	NA	NA	NA	NA	NA	NA	NA	NA	NA	NA	NA	NA	NA	NA	NA	NA	NA	NA	NA	NA	NA	NA	NA	NA	NA	NA	NA	NA	NA	NA	NA	NA	NA	NA	NA
chr5	112173590	C	T	APC	stop_gained	Coding	p.Gln767*	NA	NA	NA	NA	NA	NA	NA	NA	NA	NA	NA	NA	NA	NA	NA	NA	NA	NA	NA	NA	NA	NA	NA	NA	NA	NA	NA	NA	NA	NA	NA	NA	NA	NA	NA	NA	NA	NA	NA	NA	NA	NA
chr5	112173893	G	T	APC	stop_gained	Coding	p.Glu868*	NA	NA	NA	NA	NA	NA	NA	NA	NA	NA	NA	NA	NA	NA	NA	NA	NA	NA	NA	NA	NA	NA	NA	NA	NA	NA	NA	NA	NA	NA	NA	NA	NA	NA	NA	NA	NA	NA	NA	NA	NA	NA
chr5	112174343	G	T	APC	missense_variant	Coding	p.Asp1018Tyr	NA	NA	NA	NA	NA	NA	NA	NA	NA	NA	NA	NA	NA	NA	NA	NA	NA	NA	NA	NA	NA	NA	NA	NA	NA	NA	NA	NA	NA	NA	NA	NA	NA	NA	NA	NA	NA	NA	NA	NA	NA	NA
chr5	112162879	AT	A	APC	frameshift_variant	Coding	p.Ile495fs	NA	NA	NA	NA	NA	NA	NA	NA	NA	NA	NA	NA	NA	NA	NA	NA	NA	NA	NA	NA	NA	NA	NA	NA	NA	NA	NA	NA	NA	NA	NA	NA	NA	NA	NA	NA	NA	NA	NA	NA	NA	NA
chr5	112176020	G	T	APC	stop_gained	Coding	p.Glu1577*	NA	NA	NA	NA	NA	NA	NA	NA	NA	NA	NA	NA	NA	NA	NA	NA	NA	NA	NA	NA	NA	NA	NA	NA	NA	NA	NA	NA	NA	NA	NA	NA	NA	NA	NA	NA	NA	NA	NA	NA	NA	NA
chr5	112175513	G	T	APC	stop_gained	Coding	p.Glu1408*	NA	NA	NA	NA	NA	NA	NA	NA	NA	NA	NA	NA	NA	NA	NA	NA	NA	NA	NA	NA	NA	NA	NA	NA	NA	NA	NA	NA	NA	NA	NA	NA	NA	NA	NA	NA	NA	NA	NA	NA	NA	NA
chr5	112162891	C	T	APC	stop_gained	Coding	p.Arg499*	NA	NA	NA	NA	NA	NA	NA	NA	NA	NA	NA	NA	NA	NA	NA	NA	0/1:49,12:0.204	NA	NA	NA	NA	NA	NA	NA	NA	NA	NA	NA	NA	NA	NA	NA	NA	NA	NA	NA	NA	NA	NA	NA	NA	NA
chr5	112151204	C	T	APC	stop_gained	Coding	p.Arg283*	NA	NA	NA	NA	NA	NA	NA	NA	NA	NA	NA	NA	NA	NA	NA	0/1:66,8:0.127	NA	NA	NA	NA	NA	NA	NA	NA	NA	NA	NA	NA	NA	NA	NA	NA	NA	NA	NA	NA	NA	NA	NA	NA	NA	NA
chr5	112173374	C	T	APC	stop_gained	Coding	p.Gln695*	NA	NA	NA	NA	NA	NA	NA	NA	NA	NA	NA	NA	0/1:158,13:0.073	NA	NA	NA	NA	NA	NA	NA	NA	NA	NA	NA	NA	NA	NA	NA	NA	NA	NA	NA	NA	NA	NA	NA	NA	NA	NA	NA	NA	NA
chr5	112175245	TC	T	APC	frameshift_variant	Coding	p.Pro1319fs	NA	NA	NA	NA	NA	NA	NA	NA	NA	NA	NA	NA	NA	NA	NA	NA	NA	NA	NA	NA	NA	NA	NA	NA	NA	NA	NA	NA	NA	NA	NA	NA	NA	NA	NA	NA	NA	0/1:31,6:0.152	NA	NA	NA	NA
chr5	112111325	G	T	APC	splice_acceptor_variant&intron_variant	Coding	.	NA	NA	NA	NA	NA	NA	NA	NA	NA	NA	NA	NA	NA	NA	NA	NA	NA	NA	NA	NA	NA	NA	NA	NA	NA	NA	NA	NA	NA	NA	NA	NA	NA	NA	NA	NA	NA	NA	0/1:19,6:0.227	NA	NA	NA
chr5	112162804	G	A	APC	splice_acceptor_variant&intron_variant	Coding	.	NA	NA	NA	NA	NA	NA	NA	NA	NA	NA	NA	NA	NA	NA	NA	NA	NA	NA	NA	NA	NA	NA	NA	NA	NA	NA	NA	NA	NA	NA	NA	NA	NA	NA	NA	NA	NA	NA	NA	0/1:33,10:0.263	0/1:15,9:0.391	NA
chr5	112137012	G	A	APC	missense_variant	Coding	p.Asp256Asn	NA	NA	NA	NA	NA	NA	NA	NA	NA	NA	NA	NA	NA	NA	NA	NA	NA	NA	NA	NA	NA	NA	NA	NA	NA	NA	NA	NA	NA	NA	NA	NA	NA	NA	NA	NA	NA	NA	NA	NA	NA	NA
chr5	112176864	G	A	APC	missense_variant	Coding	p.Arg1858Gln	NA	0/1:67,60:0.459	0/1:35,34:0.492	0/1:28,25:0.460	0/1:46,44:0.468	0/1:29,27:0.449	0/1:81,57:0.407	NA	NA	NA	NA	NA	NA	NA	NA	NA	NA	NA	NA	NA	NA	NA	NA	NA	NA	NA	NA	NA	NA	NA	NA	NA	NA	NA	NA	NA	NA	NA	NA	NA	NA	NA
[truncated: 25 more columns]

## Sheet: Primers for sanger seq
Patient	Gene	Type	Start	Ref	Alt	Forward primer	Reverse primer
FAP1	APC	Germline	112175211	TAAAAG	T	GTAATCAGACGACACAGGAAGC	AGTGTTCAGGTGGACTTTTGGG
FAP2	APC	Germline	112175475	G	GT	TCCCTCCAAAAGTGGTGCTC	GTTTGAGGAGGTGGTGGAGG
FAP3	APC	Germline	112173388	G	A	TTCAGGCAAATCCTAAGAGAGAACA	TTCGCAGGCCTATTTGCCAT
FAP4	APC	Germline	112137081	G	C	GAACAAGCATGAAACCGGCTC	AGAAATGACAGCACATTGGTACT
FAP5	APC	Post-zygotic	112175419	TG	T	TGTGAGCGAAGTTCCAGCAG	GCTGGCAATCGAACGACTCT
			112175417	TA	T
			112175411	GAAC	G
MAP1	MUTYH	Germline	45800165	G	A	GAAGCTGGACCCCATGTGAAT	ACGTATCACAATCCCTTCCCA
		Germline	45797972	G	A	TGTGGTGGATGGCAACGTA	CAGTAGGCTTACTCTCTGGCG
