# Supplementary material
Source: HighWire-hosted journal article supplement (https://gut.bmj.com/content/69/7/1283)
Supplement: inline-supplementary-material-3 [file inline-supplementary-material-3.xlsx]

## Sheet: Tissue summary
Patient	Gender	Age	Number of lesions	Number of tissue collected					SUM
				Blood	Adjacent normal tissue	Adenoma		Carcinoma
						Low grade	High grade
FAP1	Female	63	NR	1	1	1	2	1	6
FAP2	Female	33	>1000	1	1	0	2	3	7
FAP3	Female	56	>1000	1	1	2	0	1	5
FAP4	Female	43	>1000	1	2	7	0	0	10
FAP5	Male	32	500-1000	1	2	8	0	0	11
FAP6	Female	29	500-1000	/	1	0	1	0	2
MAP1	Female	62	100-200	1	2	5	0	3	11
CRC1	Female	72	1	/	1	0	0	1	2
CRC2	Female	76	1	/	1	0	0	1	2
SUM	/	/	/	6	12	23	5	10	56
NR: not record
